# Supplementary material for: The Bacterial Urban Resistome: Recent Advances
Source: MDPI journal article supplement (doi:10.3390/antibiotics11040512), 2022-04-12
Supplement: s1 [file s1]

Figure 3 has been produced by using the following methodology. The search has been completed in PubMed.

### **1) Filter used to search Hospitals:**

("hospita\*" [All Fields] AND "Ab GENE" [All Fields] AND (("anti bacterial agents" [Pharmacological Action] OR "anti bacterial agents" [MeSH Terms] OR ("anti bacterial" [All Fields] AND "agents" [All Fields]) OR "anti bacterial agents" [All Fields] OR "antibiotic" [All Fields] OR "antibiotics" [All Fields] OR "antibiotic s" [All Fields] OR "antibiotical" [All Fields]) AND "resistanc\*" [All Fields])) AND ((ffrft[Filter]) AND (fft[Filter]) AND (1990:3000/12/12[pdat]))

antibiotic: "anti-bacterial agents" [Pharmacological Action] OR "anti-bacterial agents" [MeSH Terms] OR ("anti-bacterial" [All Fields] AND "agents" [All Fields]) OR "anti-bacterial agents" [All Fields] OR "antibiotic" [All Fields] OR "antibiotics" [All Fields] OR "antibiotic's" [All Fields] OR "antibiotical" [All Fields]

### **2) Filter used to search Pets or in alternative “companion anima”**

("pet" [All Fields] AND "Ab GENE" [All Fields] AND (("anti bacterial agents" [Pharmacological Action] OR "anti bacterial agents" [MeSH Terms] OR ("anti bacterial" [All Fields] AND "agents" [All Fields]) OR "anti bacterial agents" [All Fields] OR "antibiotic" [All Fields] OR "antibiotics" [All Fields] OR "antibiotic s" [All Fields] OR "antibiotical" [All Fields]) AND "resistanc\*" [All Fields])) AND ((ffrft[Filter]) AND (fft[Filter]) AND (1990:3000/12/12[pdat]))

antibiotic: "anti-bacterial agents" [Pharmacological Action] OR "anti-bacterial agents" [MeSH Terms] OR ("anti-bacterial" [All Fields] AND "agents" [All Fields]) OR "anti-bacterial agents" [All Fields] OR "antibiotic" [All Fields] OR "antibiotics" [All Fields] OR "antibiotic's" [All Fields] OR "antibiotical" [All Fields]

Note plasmid pET was excluded.

### **3) Filter used to search recreational and park**

((("recreational" [All Fields] OR "park\*" [All Fields]) AND (("anti bacterial agents" [Pharmacological Action] OR "anti bacterial agents" [MeSH Terms] OR ("anti bacterial" [All Fields] AND "agents" [All Fields]) OR "anti bacterial agents" [All Fields] OR "antibiotic" [All Fields] OR "antibiotics" [All Fields] OR "antibiotic s" [All Fields] OR "antibiotical" [All Fields]) AND "resistanc\*" [All Fields]) AND "tetM" [All Fields]) AND ((ffrft[Filter]) AND (fft[Filter]) AND (1990:3000/12/12[pdat]))

antibiotic: "anti-bacterial agents" [Pharmacological Action] OR "anti-bacterial agents" [MeSH Terms] OR ("anti-bacterial" [All Fields] AND "agents" [All Fields]) OR "anti-bacterial agents" [All Fields] OR "antibiotic" [All Fields] OR "antibiotics" [All Fields] OR "antibiotic's" [All Fields] OR "antibiotical" [All Fields]

#### 4) Filter used to search sewage

("sewage"[All Fields] AND (("anti bacterial agents"[Pharmacological Action] OR "anti bacterial agents"[MeSH Terms] OR ("anti bacterial"[All Fields] AND "agents"[All Fields]) OR "anti bacterial agents"[All Fields] OR "antibiotic"[All Fields] OR "antibiotics"[All Fields] OR "antibiotic s"[All Fields] OR "antibiotical"[All Fields]) AND "resistanc\*"[All Fields]) AND "tetA"[All Fields]) AND ((ffrft[Filter]) AND (fft[Filter]) AND (1990:3000/12/12[pdat]))

antibiotic: "anti-bacterial agents"[Pharmacological Action] OR "anti-bacterial agents"[MeSH Terms] OR ("anti-bacterial"[All Fields] AND "agents"[All Fields]) OR "anti-bacterial agents"[All Fields] OR "antibiotic"[All Fields] OR "antibiotics"[All Fields] OR "antibiotic's"[All Fields] OR "antibiotical"[All Fields]
